# Supplementary material
Source: MDPI journal article supplement (https://www.mdpi.com/2673-3293/3/3/32)
Supplement: s1 [file s1]

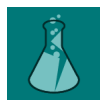

## Supporting Information

# Carbon- $\alpha$ -Fe<sub>2</sub>O<sub>3</sub> Composite Active Material for High-Capacity Electrodes with High Mass Loading and Flat Current Collector for Quasi-Symmetric Supercapacitors

Maedeh Najafi <sup>1,2</sup>, Sebastiano Bellani <sup>3,\*</sup>, Valerio Galli <sup>4</sup>, Marilena Isabella Zappia <sup>3</sup>, Ahmad Bagheri <sup>5</sup>, Milad Saffarpour <sup>1,2</sup>, Hossein Beydaghi <sup>3</sup>, Matilde Eredia <sup>3</sup>, Lea Pasquale <sup>6</sup>, Riccardo Carzino <sup>1</sup>, Simone Lauciello <sup>7</sup>, Jaya-Kumar Panda <sup>3</sup>, Rosaria Brescia <sup>7</sup>, Luca Gabatell <sup>3,8</sup>, Vittorio Pellegrini <sup>3</sup> and Francesco Bonaccorso <sup>3</sup>

<sup>1</sup> Smart Materials, Istituto Italiano di Tecnologia, Via Morego 30, 16163 Genova, Italy

<sup>2</sup> Dipartimento di Informatica Bioingegneria, Robotica e Ingegneria dei Sistemi (DIBRIS), Università Degli Studi di Genova, Via All'Opera Pia 13, 16145 Genova, Italy

<sup>3</sup> BeDimensional S.p.A., Via Lungotorrente Secca 30R, 16163 Genova, Italy

<sup>4</sup> Center for Nano Science and Technology@PoliMi, Istituto Italiano di Tecnologia, Via Pascoli 70/3, 20133 Milano, Italy

<sup>5</sup> Graphene Labs, Istituto Italiano di Tecnologia, Via Morego 30, 16163 Genova, Italy

<sup>6</sup> Materials Characterization Facility, Istituto Italiano di Tecnologia, Via Morego 30, 16163 Genova, Italy

<sup>7</sup> Electron Microscopy Facility, Istituto Italiano di Tecnologia, Via Morego, 30, 16163 Genova, Italy

<sup>8</sup> Department of Mechanical Engineering-DIME, University of Genoa, 16145 Genova, Italy

\* Correspondence: s.bellani@bedimensional.it

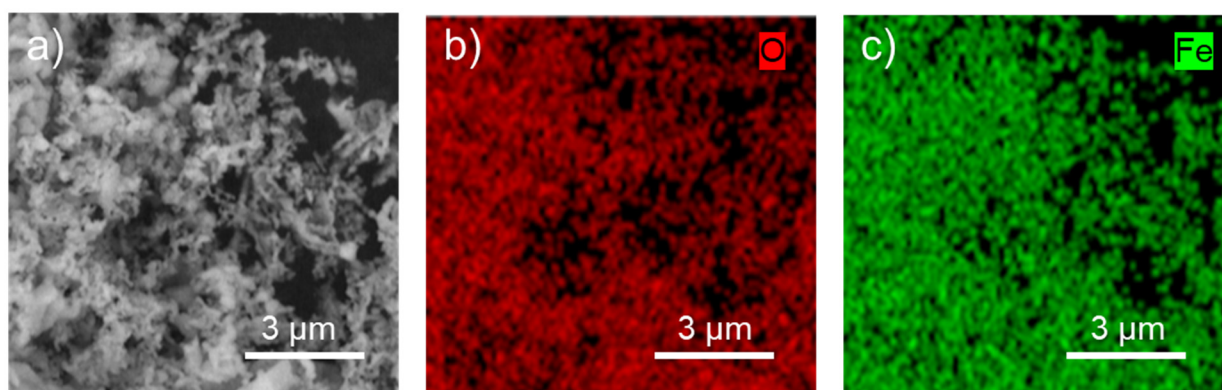

**Figure S1.** SEM-EDS analysis of C-Fe<sub>2</sub>O<sub>3</sub> active material: a) SEM image and the corresponding EDS maps for b) O (K line) and Fe (K $\alpha$  line).

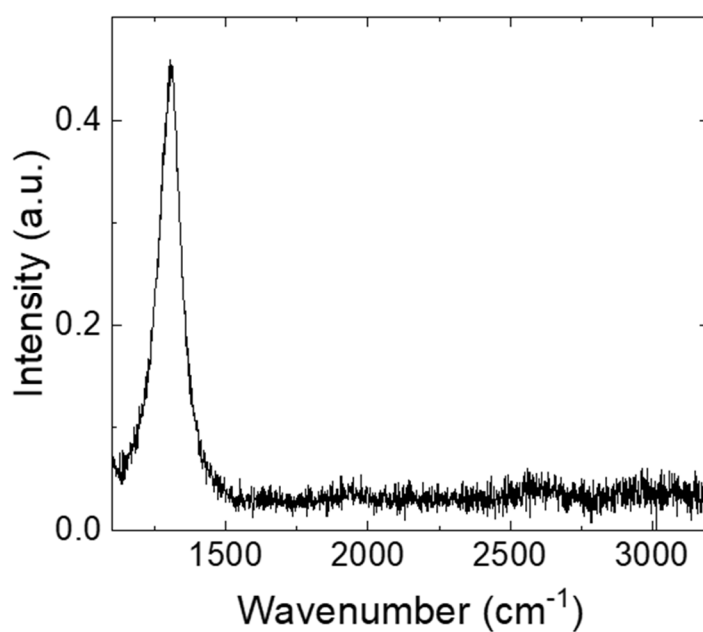

**Figure S2.** Raman spectrum of C-Fe<sub>2</sub>O<sub>3</sub> in the spectral region of G, D and 2D peaks of graphitic species (1100-3200 cm<sup>-1</sup>).

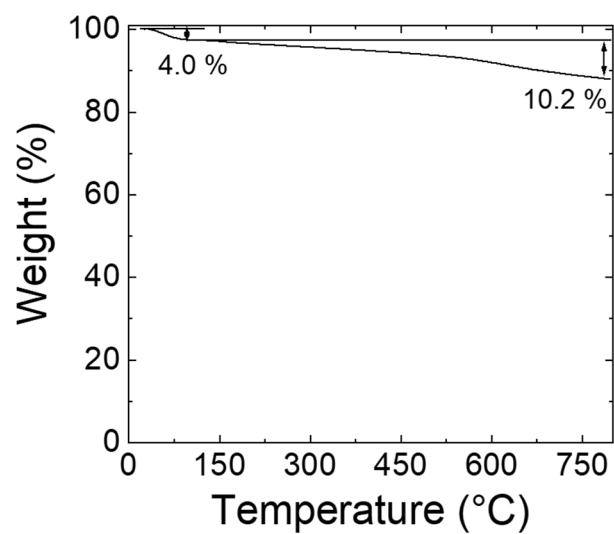

**Figure S3.** Thermogravimetric analysis (TGA) curve measured for C-Fe<sub>2</sub>O<sub>3</sub> in air.

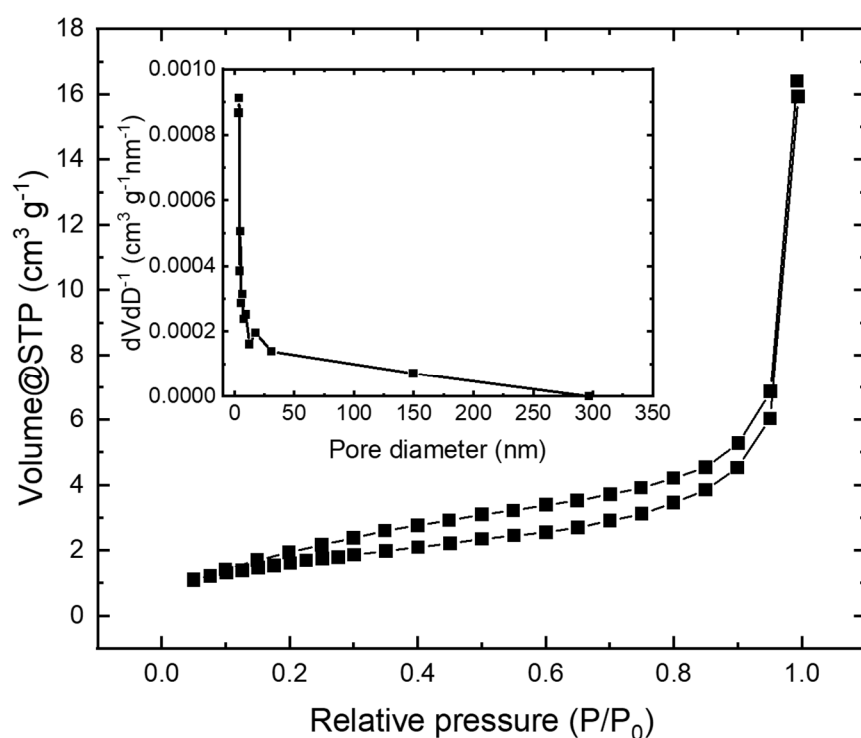

**Figure S4.** N<sub>2</sub> adsorption-desorption isotherm and the Barret-Joyner-Halenda (BJH) pore size distribution curve (inset) of the C-Fe<sub>2</sub>O<sub>3</sub>.

**Table S1.** Comparison between the electrochemical performances of our C-Fe<sub>2</sub>O<sub>3</sub> and other Fe<sub>2</sub>O<sub>3</sub>-based active materials reported in relevant literature. The table is subdivided in different categories (indicated by different colors), depending on the substrate used for the electrochemical characterization of the active material.

| Materials                                                                             | Type of substrate/electrode | Substrate      | Synthesis method                            | Electrolyte                           | Active material mass loading | Effective capacitance (C <sub>eff</sub> )                                       | Reference |
|---------------------------------------------------------------------------------------|-----------------------------|----------------|---------------------------------------------|---------------------------------------|------------------------------|---------------------------------------------------------------------------------|-----------|
| C-Fe <sub>2</sub> O <sub>3</sub>                                                      | Flat                        | graphite paper | Electrospinning + calcination/carbonization | 6 M KOH                               | > 1 mg cm <sup>-2</sup>      | 265.9 F g <sup>-1</sup> (or 478.6 mF cm <sup>-2</sup> ) at 2 mV s <sup>-1</sup> | This work |
| Fe <sub>2</sub> O <sub>3</sub> nanotubes on reduced graphene oxide                    | Flat                        | Etched-Cu foil | Hydrothermal                                | 1 M Na <sub>2</sub> SO <sub>4</sub>   | 1.5-2 mg cm <sup>-2</sup>    | 114 F g <sup>-1</sup> at 5 A g <sup>-1</sup>                                    | [1]       |
| FeS <sub>2</sub> nanosheet/Fe <sub>2</sub> O <sub>3</sub> nanosphere heterostructures | Flat                        | Ti foil        | Hydrothermal                                | 1 M Li <sub>2</sub> SO <sub>4</sub>   | Not given                    | 255 F g <sup>-1</sup> at 1 A g <sup>-1</sup>                                    | [2]       |
| Reduced graphene oxide/Fe <sub>2</sub> O <sub>3</sub> nanocomposite                   | Flat                        | Glassy carbon  | Direct one step chemical reduction process  | 0.5 M H <sub>2</sub> SO <sub>4</sub>  | Not given                    | 50 F g <sup>-1</sup> at 0.1 V s <sup>-1</sup>                                   | [3]       |
| Fe <sub>2</sub> O <sub>3</sub> quantum dots on functionalized graphene                | Flat                        | Ti foil        | Thermal decomposition                       | 1 M Na <sub>2</sub> SO <sub>4</sub>   | 2-3 mg cm <sup>-2</sup>      | 347 F g <sup>-1</sup> at 10 mV s <sup>-1</sup>                                  | [4]       |
| Fe <sub>2</sub> O <sub>3</sub> on carbon nanotubes sponge                             | Free-standing               | -              | Hydrothermal                                | 2 M KCl                               | Not given                    | 296.3 F g <sup>-1</sup> at 5 mV s <sup>-1</sup>                                 | [5]       |
| Fe <sub>2</sub> O <sub>3</sub> on graphene foam-carbon nanotube forest                | Free-standing               | -              | Atomic layer deposition                     | 2 M KOH                               | Not given                    | 470.5 mF cm <sup>-2</sup> at 20 mA cm <sup>-2</sup>                             | [6]       |
| Fe <sub>2</sub> O <sub>3</sub> on graphene                                            | Bulky/heavy porous          | Ni foam        | Hydrothermal combined + slow annealing      | 1 M Na <sub>2</sub> SO <sub>4</sub>   | 7.2 mg cm <sup>-2</sup>      | 306.9 F g <sup>-1</sup> at 3 A g <sup>-1</sup>                                  | [7]       |
| Graphene aerogel-encapsulated Fe <sub>2</sub> O <sub>3</sub>                          | Bulky/heavy porous          | Ni foam        | Hydrothermal                                | 0.5 M Na <sub>2</sub> SO <sub>4</sub> | Not given                    | 81.3 F g <sup>-1</sup> at 1 A g <sup>-1</sup>                                   | [8]       |

|                                                                      |                                             |              |                                                                    |                                     |                          |                                                  |      |
|----------------------------------------------------------------------|---------------------------------------------|--------------|--------------------------------------------------------------------|-------------------------------------|--------------------------|--------------------------------------------------|------|
| Graphene/Fe <sub>2</sub> O <sub>3</sub> composite hydrogel           | Bulky/heavy porous                          | Ni foam      | Hydrothermal                                                       | 1 M KOH                             | 1 mg cm <sup>-2</sup>    | 908 F g <sup>-1</sup> at 2 A g <sup>-1</sup>     | [9]  |
| Graphene/Fe <sub>2</sub> O <sub>3</sub> /polyaniline                 | Bulky/heavy porous                          | Ni foam      | Two step synthesis                                                 | 6 M KOH                             | Not given                | 638 F g <sup>-1</sup> at 1 mV s <sup>-1</sup>    | [10] |
| PEDOT-coated doped Fe <sub>2</sub> O <sub>3</sub>                    | Ti-Bulky porous                             | Carbon cloth | Two-step process (hydrothermal + in-situ oxidative polymerization) | 5 M LiCl                            | 3.7 mg cm <sup>-2</sup>  | 311.6 F g <sup>-1</sup> at 1 mA cm <sup>-2</sup> | [11] |
| Polyaniline/Fe <sub>2</sub> O <sub>3</sub> -decorated (PGF) hydrogel | graphene composite Bulky porous             | Carbon cloth | Chemical synthesis                                                 | 1 M H <sub>2</sub> SO <sub>4</sub>  | Not given                | 1124 F g <sup>-1</sup> at 0.25 A g <sup>-1</sup> | [12] |
| Polypyrrole-encapsulated nanotube arrays                             | Fe <sub>2</sub> O <sub>3</sub> Bulky porous | Carbon cloth | Sacrificial template + electrodeposition methods                   | 1 M Na <sub>2</sub> SO <sub>4</sub> | 1.24 mg cm <sup>-2</sup> | 237 mF cm <sup>-2</sup> at 1 mA cm <sup>-2</sup> | [13] |

## References

- Lee, K.K.; Deng, S.; Fan, H.M.; Mhaisalkar, S.; Tan, H.R.; Tok, E.S.; Loh, K.P.; Chin, W.S.; Sow, C.H.  $\alpha$ -Fe<sub>2</sub>O<sub>3</sub> Nanotubes-Reduced Graphene Oxide Composites as Synergistic Electrochemical Capacitor Materials. *Nanoscale* **2012**, *4*, 2958–2961.
- Zhong, Y.; Liu, J.; Lu, Z.; Xia, H. Hierarchical FeS<sub>2</sub> Nanosheet@Fe<sub>2</sub>O<sub>3</sub> Nanosphere Heterostructure as Promising Electrode Material for Supercapacitors. *Mater. Lett.* **2016**, *166*, 223–226.
- Bhujel, R.; Rai, S.; Deka, U.; Swain, B.P. Electrochemical, Bonding Network and Electrical Properties of Reduced Graphene Oxide-Fe<sub>2</sub>O<sub>3</sub> Nanocomposite for Supercapacitor Electrodes Applications. *J. Alloys Compd.* **2019**, *792*, 250–259.
- Xia, H.; Hong, C.; Li, B.; Zhao, B.; Lin, Z.; Zheng, M.; Savilov, S. V.; Aldoshin, S.M. Facile Synthesis of Hematite Quantum-Dot/Functionalized Graphene-Sheet Composites as Advanced Anode Materials for Asymmetric Supercapacitors. *Adv. Funct. Mater.* **2015**, *25*, 627–635.
- Cheng, X.; Gui, X.; Lin, Z.; Zheng, Y.; Liu, M.; Zhan, R.; Zhu, Y.; Tang, Z. Three-Dimensional  $\alpha$ -Fe<sub>2</sub>O<sub>3</sub>/Carbon Nanotube Sponges as Flexible Supercapacitor Electrodes. *J. Mater. Chem. A* **2015**, *3*, 20927–20934.
- Guan, C.; Liu, J.; Wang, Y.; Mao, L.; Fan, Z.; Shen, Z.; Zhang, H.; Wang, J. Iron Oxide-Decorated Carbon for Supercapacitor Anodes with Ultrahigh Energy Density and Outstanding Cycling Stability. *ACS Nano* **2015**, *9*, 5198–5207.
- Yang, S.; Song, X.; Zhang, P.; Sun, J.; Gao, L. Self-Assembled  $\alpha$ -Fe<sub>2</sub>O<sub>3</sub> Mesocrystals/Graphene Nanohybrid for Enhanced Electrochemical Capacitors. *Small* **2014**, *10*, 2270–2279.
- Song, Z.; Liu, W.; Xiao, P.; Zhao, Z.; Liu, G.; Qiu, J. Nano-Iron Oxide (Fe<sub>2</sub>O<sub>3</sub>)/Three-Dimensional Graphene Aerogel Composite as Supercapacitor Electrode Materials with Extremely Wide Working Potential Window. *Mater. Lett.* **2015**, *145*, 44–47.
- Wang, H.; Xu, Z.; Yi, H.; Wei, H.; Guo, Z.; Wang, X. One-Step Preparation of Single-Crystalline Fe<sub>2</sub>O<sub>3</sub> Particles/Graphene Composite Hydrogels as High Performance Anode Materials for Supercapacitors. *Nano Energy* **2014**, *7*, 86–96.
- Xia, X.; Hao, Q.; Lei, W.; Wang, W.; Sun, D.; Wang, X. Nanostructured Ternary Composites of Graphene/Fe<sub>2</sub>O<sub>3</sub>/Polyaniline for High-Performance Supercapacitors. *J. Mater. Chem.* **2012**, *22*, 16844–16850.
- Han, T.; Wei, Y.; Jin, X.; Jiu, H.; Zhang, L.; Sun, Y.; Tian, J.; Shang, R.; Hang, D.; Zhao, R. Hydrothermal Self-Assembly of  $\alpha$ -Fe<sub>2</sub>O<sub>3</sub> Nanorings@graphene Aerogel Composites for Enhanced Li Storage Performance. *J. Mater. Sci.* **2019**, *54*, 7119–7130.
- Gupta, A.; Sardana, S.; Dalal, J.; Lather, S.; Maan, A.S.; Tripathi, R.; Punia, R.; Singh, K.; Ohlan, A. Nanostructured Polyaniline/Graphene/Fe<sub>2</sub>O<sub>3</sub> Composites Hydrogel as a High-Performance Flexible Supercapacitor Electrode Material. *ACS Appl. Energy Mater.* **2020**, *3*, 6434–6446.
- Wang, Y.; Du, Z.; Xiao, J.; Cen, W.; Yuan, S. Polypyrrole-Encapsulated Fe<sub>2</sub>O<sub>3</sub> Nanotube Arrays on a Carbon Cloth Support: Achieving Synergistic Effect for Enhanced Supercapacitor Performance. *Electrochim. Acta* **2021**, *386*, 138486.
